# Supplementary material
Source: PubMed Central journal article supplement (PMC3529088)
Supplement: 1214088109_pnas.201214088SI.pdf [file 1214088109_pnas.201214088SI.pdf]

# Supporting Information

Wang et al. 10.1073/pnas.1214088109

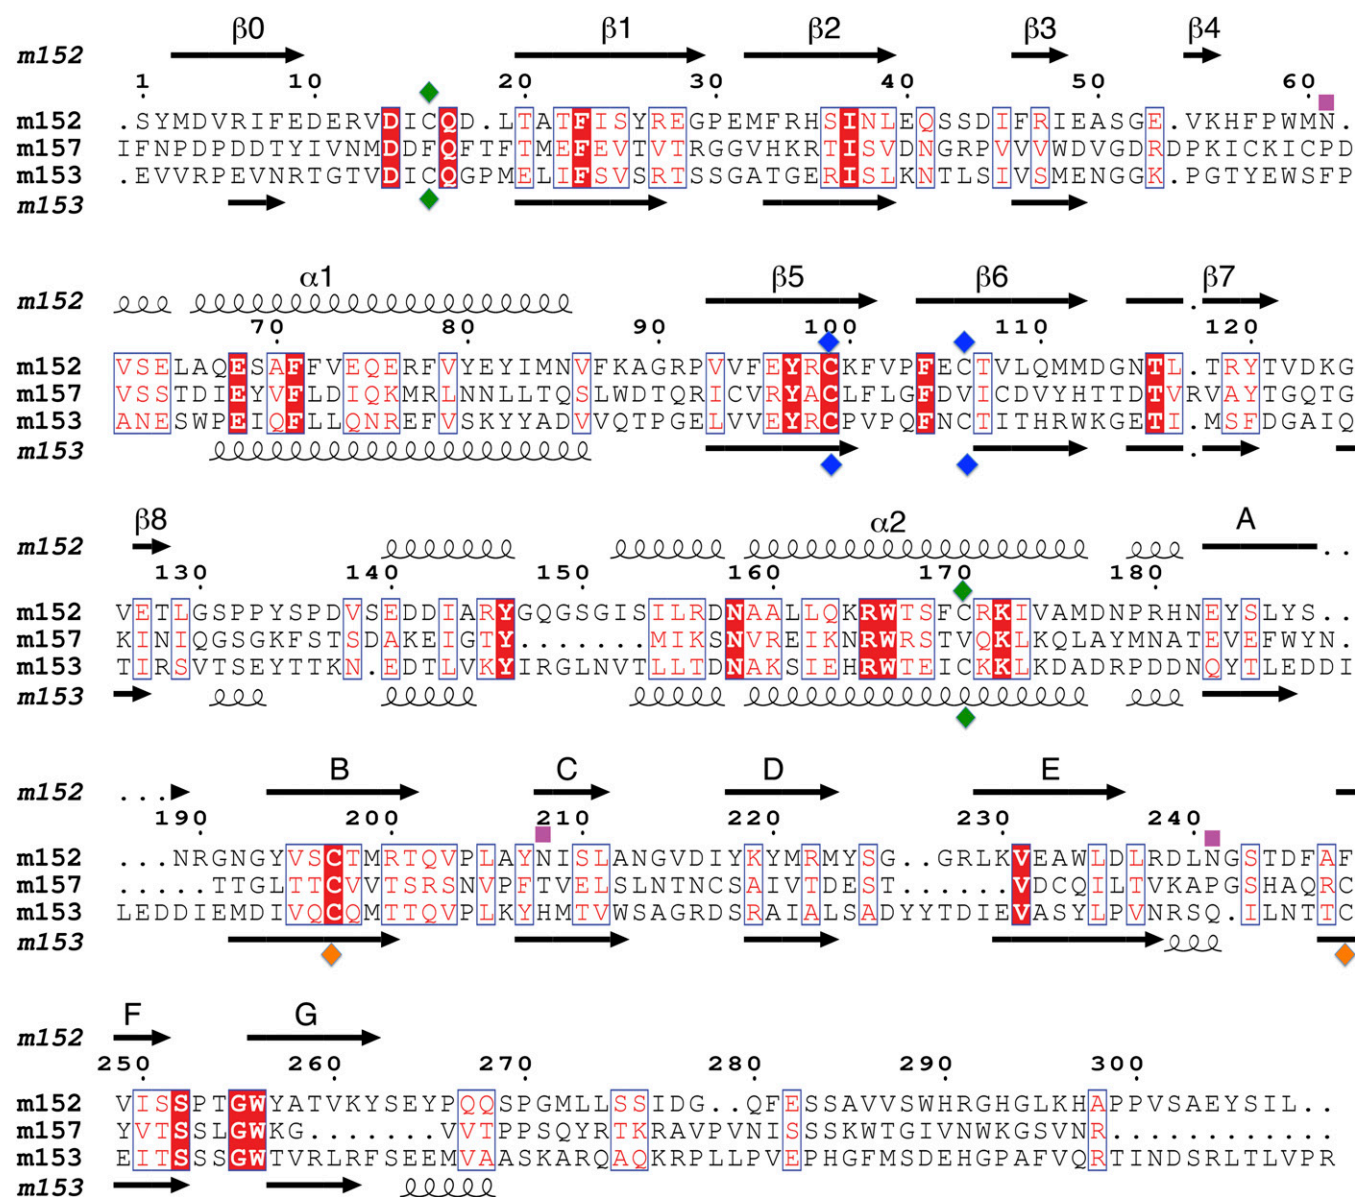

Fig. S1. Structure-based alignment of m152, m153, and m157. Amino acid sequences (extracellular domain) of the indicated proteins were aligned with ClustalW as a first guide, and alignments were further arranged based on the secondary structures of m152 and m153 by ESprict 2.2 (secondary structures of m152 and m153 are indicated). Cysteine residues involved in the disulfide bond linkages are indicated by green or blue diamonds (m152) and by green, blue, or orange diamonds (m153). Predicted N-linked glycosylation sites of m152 are indicated by pink squares.

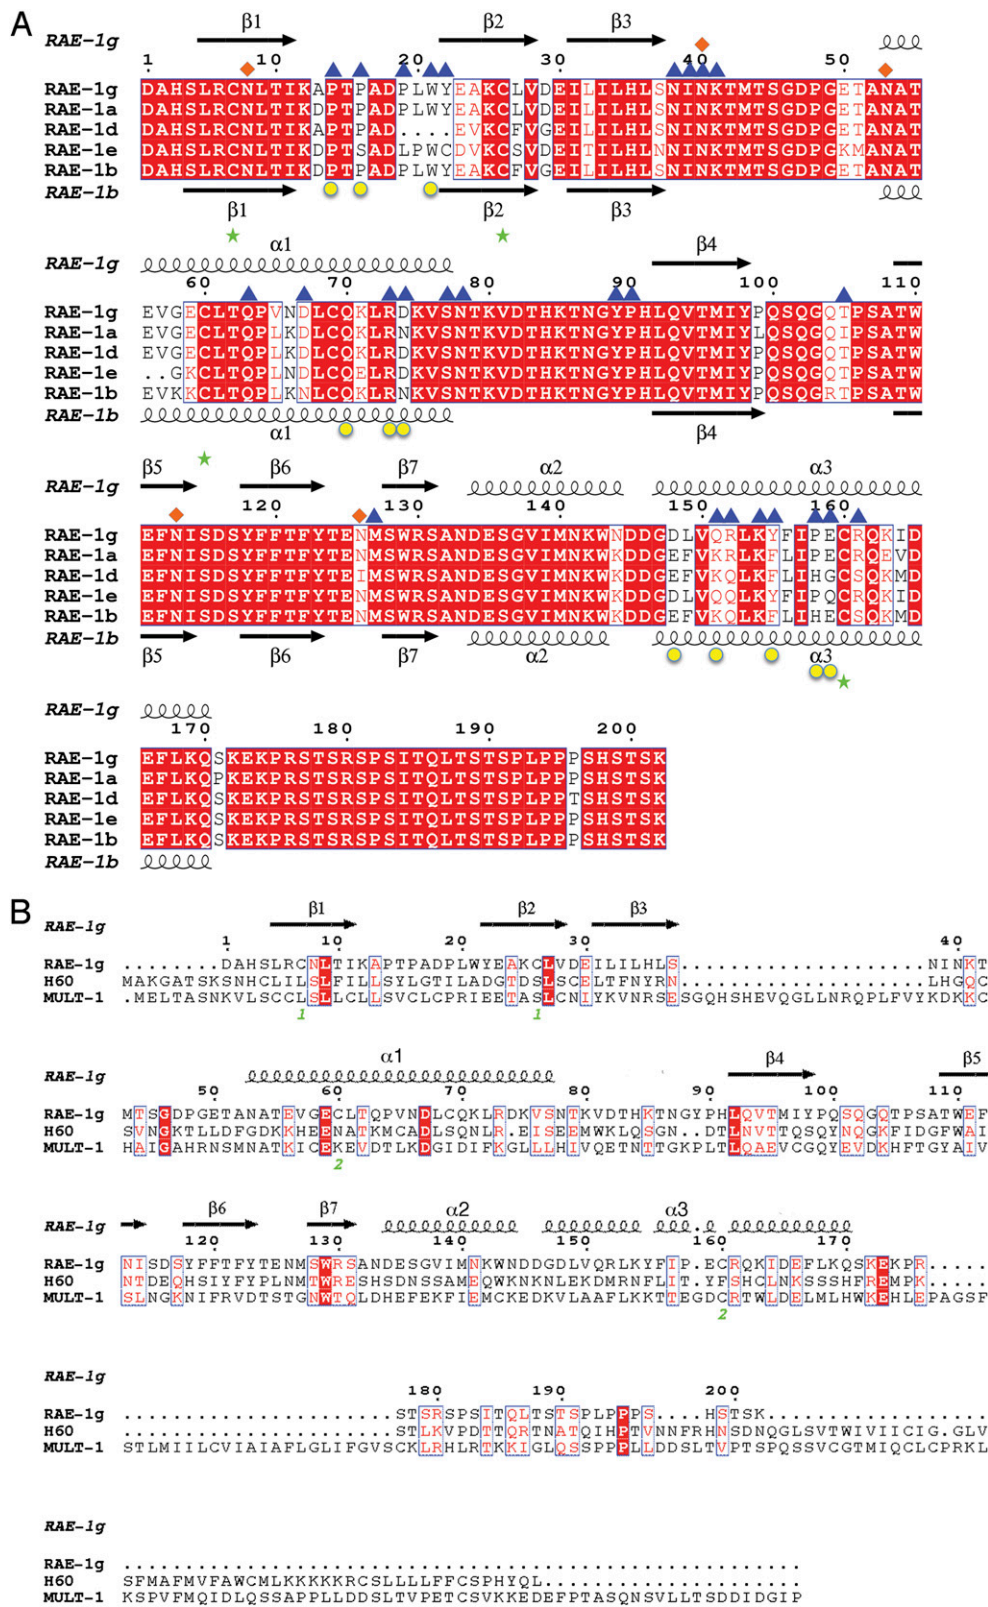

**Fig. S2.** Structure-based sequence alignment of RAE1 isoforms (A) and RAE1 $\gamma$  with H60 and murine UL16-binding protein-like transcript 1 (MULT1) (B). (A) The extracellular domains of RAE1 isoforms were first aligned with Clustal W, followed by secondary structural alignment with Esprout 2.2. RAE1 $\gamma$  residues that contact or form hydrogen bonds to m152 are indicated by blue triangles. RAE1 $\beta$  residues that contact mNKG2D are indicated by yellow circles. Orange diamonds indicate potential *N*-asparaginyl-glycosylation sites. Green stars indicate cysteine residues involved in disulfide bonds. Indicated contact sites are from the first heterodimer in the asymmetric unit. (B) Sequence alignment of RAE1 $\gamma$ , H60, and MULT1.

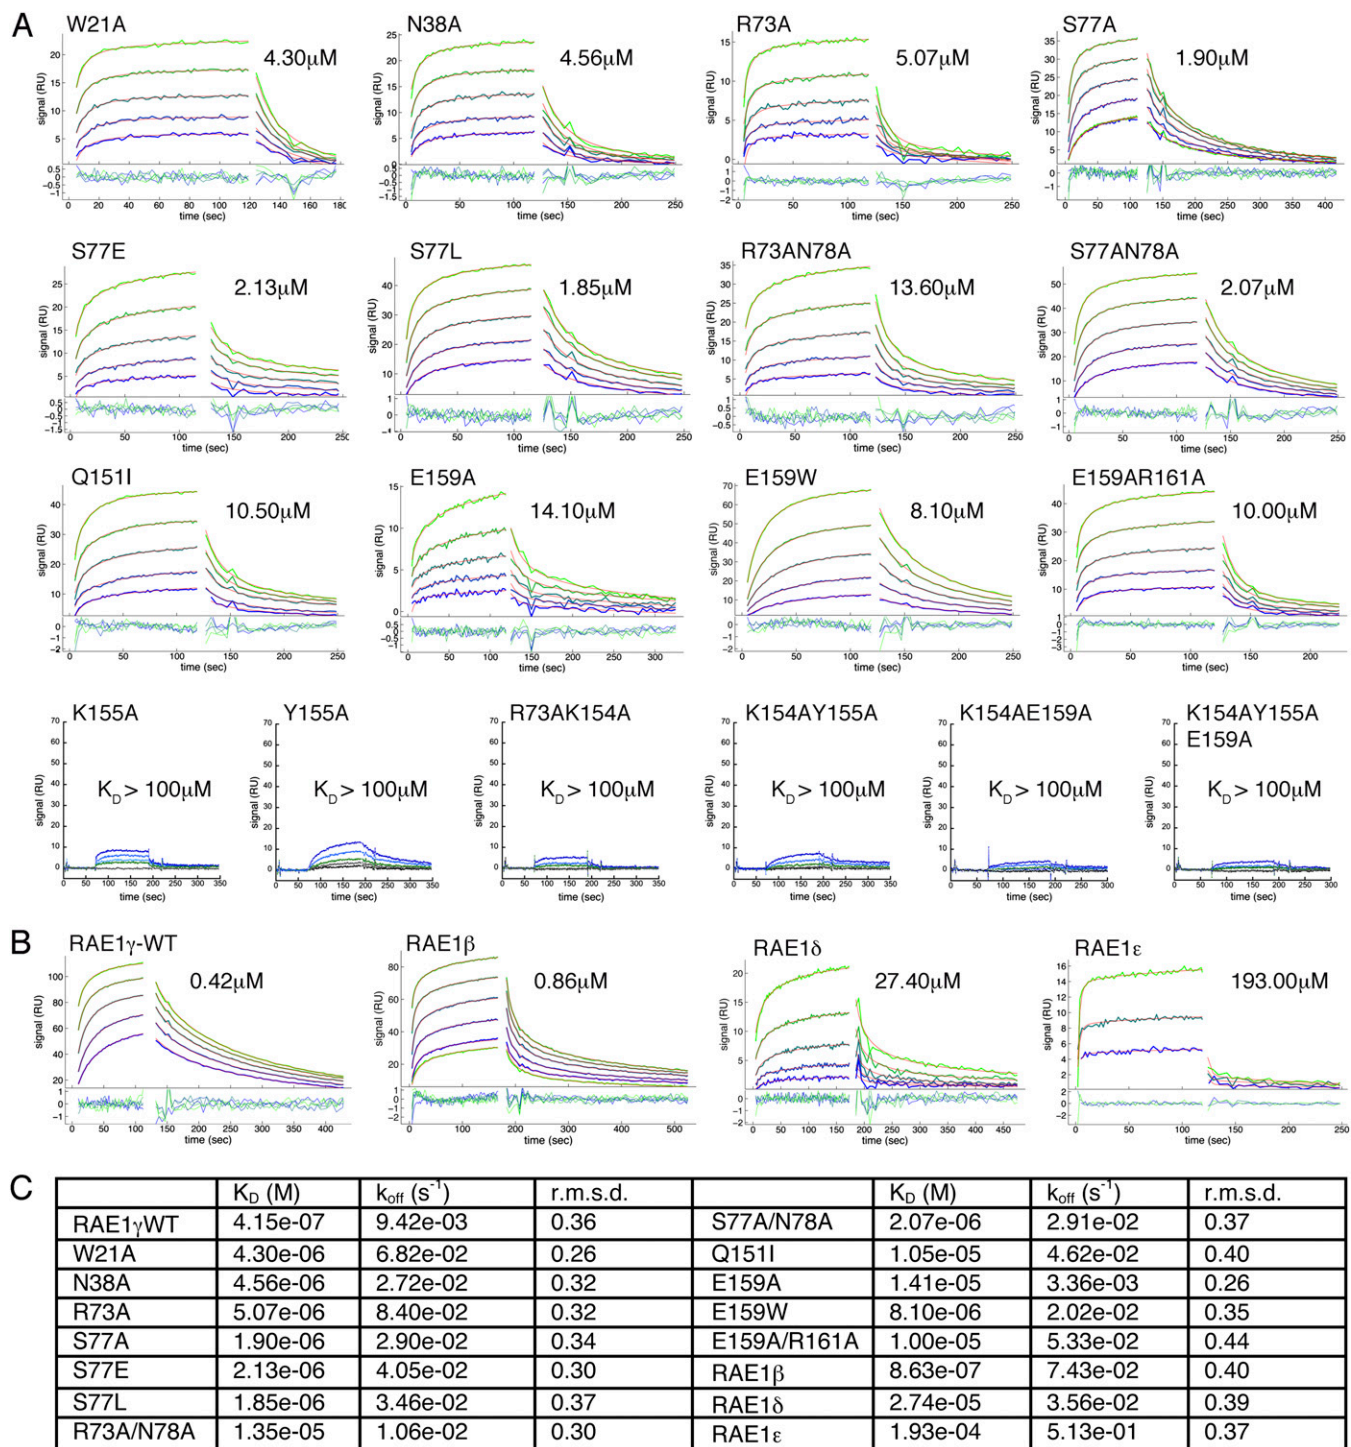

**Fig. S3.** Surface plasmon resonance (SPR) binding of RAE1 to the m152 surface. (A) Binding traces of indicated RAE1 mutants. (B) Binding isotherms of different RAE1 isoforms. m152 was coupled to CM5 biosensor chips, and RAE1 $\gamma$ ,  $\beta$ ,  $\delta$ , or  $\epsilon$  or RAE1 $\gamma$  mutants were sequentially injected over the surface. The zero time point corresponds to the start of the injection. Background binding to a mock-coupled surface was subtracted. Calculated  $K_D$  values were determined by EVILFIT or BIAevaluation 3.0 for poor binding. (For EVILFIT curve fits, residuals are plotted beneath the binding curves.) RAE1 mutants were injected at concentrations of 0.4, 0.8, 1.6, 3.2, and 6.5  $\mu$ M. Wild-type RAE1 $\gamma$ , RAE1 $\beta$ , and RAE1 $\delta$  were injected at five concentrations, 0.4, 0.8, 1.6, 3.2, and 6.5  $\mu$ M, over the coupled m152 surface. RAE1 $\epsilon$  was offered at concentrations of 1.6, 3.2, and 6.5  $\mu$ M. (C) Values for  $K_D$  and  $k_{off}$  as determined in EVILFIT along with the rmsd of the global fits are tabulated.



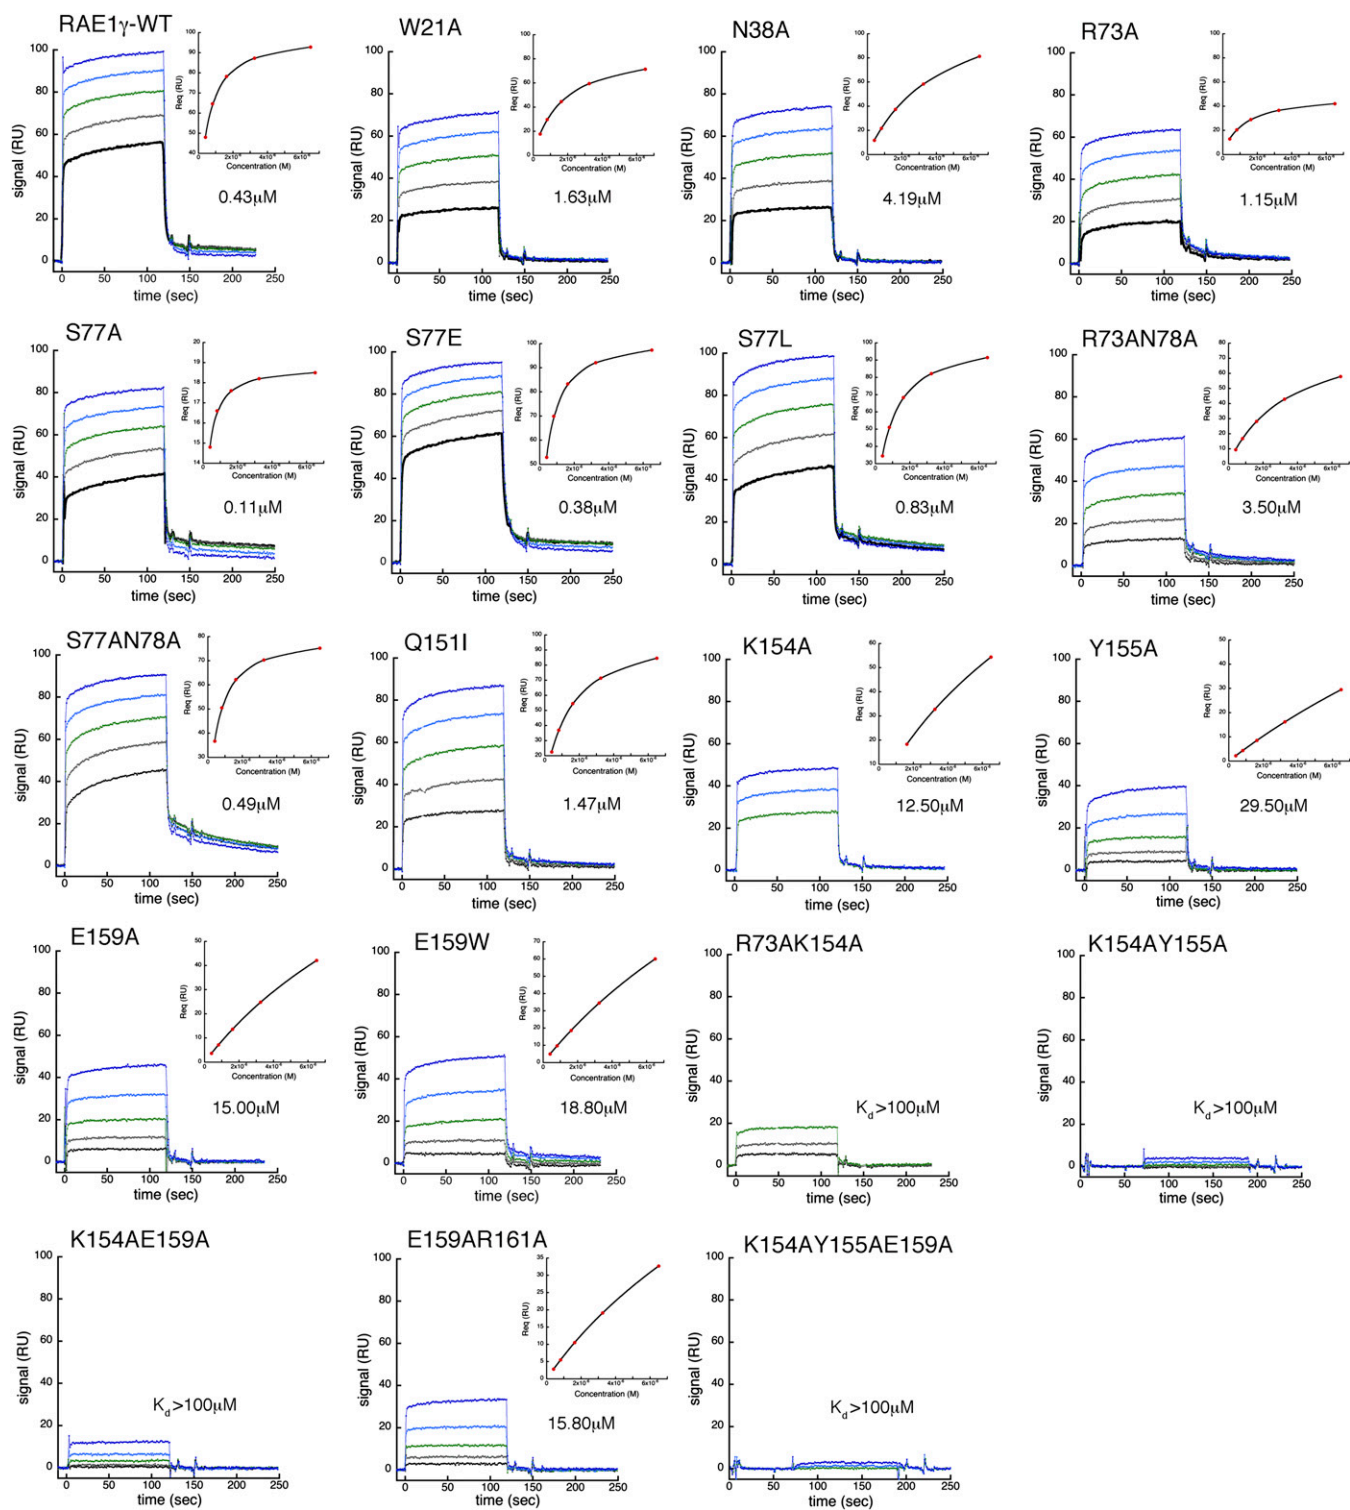

**FIG. S5.** SPR binding of wild-type RAE1 $\gamma$  and mutants to the NKG2D surface. mNKG2D-Fc was coupled to CM5 biosensor chips, and wild-type RAE1 $\gamma$  and RAE1 $\gamma$  mutants were injected sequentially. Calculated  $K_d$  values were determined by steady-state evaluation of global curve fits using BIAevaluation 3.0. *Insets* show plots of binding isotherms. Wild-type RAE1 $\gamma$  and most RAE1 $\gamma$  mutants were injected at five concentrations: 0.4, 0.8, 1.6, 3.2, and 6.5  $\mu$ M. K154A, R73A/K154A, and K154A/Y155A/E159A mutants were injected at graded concentrations of 1.6, 3.2, and 6.5  $\mu$ M.





**Table S1. Data collection and refinement statistics for m152/RAE1 $\gamma$** 

| Data collection                        |                         |
|----------------------------------------|-------------------------|
| Space group                            | C2                      |
| Cell dimensions                        |                         |
| <i>a</i> , <i>b</i> , <i>c</i> (Å)     | 193.443, 99.800, 68.609 |
| $\alpha$ , $\beta$ , $\gamma$ (°)      | 90.00, 100.72, 90.00    |
| Resolution (Å)                         | 50–2.45 (2.54–2.45)*    |
| $R_{\text{sym}}$ or $R_{\text{merge}}$ | 0.077 (0.578)           |
| $I/\sigma I$                           | 25.9 (2.8)              |
| Completeness (%)                       | 98.3( 96.4)             |
| Redundancy                             | 7.5 (6.6)               |
| Refinement                             |                         |
| Resolution (Å)                         |                         |
| No. reflections                        | 45,215                  |
| $R_{\text{work}}/R_{\text{free}}$      | 0.20/0.24               |
| No. atoms                              |                         |
| Protein                                | 69,18                   |
| Carbohydrate                           | 4                       |
| Water                                  | 75                      |
| B-factors                              | 51.8                    |
| Protein                                | 51.7                    |
| Carbohydrate                           | 51.0                    |
| Water                                  | 48.2                    |
| Rmsd                                   |                         |
| Bond lengths (Å)                       | 0.009                   |
| Bond angles (°)                        | 1.30                    |
| Ramachandran statistics                |                         |
| Favored (%)                            | 96                      |
| Outliers (%)                           | 0.12                    |

The dataset was collected on a single crystal.  
 \*Values in parentheses are for highest-resolution shell.

**Table S2. Interactions between m152 and RAE1 $\gamma$** 

| Hydrogen bonds (heterodimer 1.<br>A, C chain) |                        |            | Hydrogen bonds (heterodimer 2.<br>B, D chain) |                        |            |
|-----------------------------------------------|------------------------|------------|-----------------------------------------------|------------------------|------------|
| RAE1 $\gamma$                                 | m152                   | Length (Å) | RAE1 $\gamma$                                 | m152                   | Length (Å) |
| Trp <sup>21</sup> NE1                         | Glu <sup>28</sup> O    | 2.8        | Trp <sup>21</sup> NE1                         | Glu <sup>28</sup> O    | 2.9        |
| Tyr <sup>22</sup> OH                          | Glu <sup>28</sup> OE2  | 2.7        | Arg <sup>73</sup> NE                          | Asp <sup>113</sup> OD1 | 2.8        |
| Arg <sup>73</sup> NE                          | Asp <sup>113</sup> OD1 | 2.9        | Arg <sup>73</sup> NH2                         | Tyr <sup>134</sup> OH  | 3.0        |
| Ser <sup>77</sup> OG                          | Asp <sup>113</sup> OD2 | 2.9        | Lys <sup>154</sup> NZ                         | Asp <sup>236</sup> OD2 | 2.6        |
| Asn <sup>78</sup> OD1                         | Asn <sup>115</sup> ND2 | 3.2        | Glu <sup>159</sup> OE1                        | Arg <sup>222</sup> NH2 | 2.8        |
| Lys <sup>154</sup> NZ                         | Asp <sup>236</sup> OD2 | 2.7        | Glu <sup>159</sup> OE2                        | Arg <sup>222</sup> NE  | 2.9        |
| Glu <sup>159</sup> OE1                        | Arg <sup>222</sup> NH2 | 3.0        |                                               |                        |            |
| Glu <sup>159</sup> OE2                        | Arg <sup>222</sup> NE  | 2.9        |                                               |                        |            |



**Table S3. Contacts between m152 and RAE1 $\gamma$**

|                    | Contacts between m152 and RAE1 $\gamma$<br>(heterodimer 1. A, C chain) (distances <4 Å) |                                                                                   | Contacts between m152 and RAE1 $\gamma$<br>(heterodimer 2. B, D chain) (distances <4 Å) |                                                                                   |                    |
|--------------------|-----------------------------------------------------------------------------------------|-----------------------------------------------------------------------------------|-----------------------------------------------------------------------------------------|-----------------------------------------------------------------------------------|--------------------|
|                    | RAE1 $\gamma$                                                                           | m152                                                                              | RAE1 $\gamma$                                                                           | m152                                                                              |                    |
| Binding site A     | Pro <sup>14</sup>                                                                       | Ala <sup>89</sup> , Gly <sup>90</sup>                                             | Ala <sup>13</sup>                                                                       | Tyr <sup>134</sup>                                                                |                    |
|                    | Pro <sup>16</sup>                                                                       | Lys <sup>88</sup>                                                                 | Pro <sup>14</sup>                                                                       | Ala <sup>89</sup> , Tyr <sup>134</sup>                                            |                    |
|                    | Pro <sup>19</sup>                                                                       | Pro <sup>30</sup>                                                                 | Pro <sup>16</sup>                                                                       | Lys <sup>88</sup>                                                                 |                    |
|                    | Trp <sup>21</sup>                                                                       | Tyr <sup>26</sup> , Glu <sup>28</sup> , Gly <sup>90</sup> , Pro <sup>92</sup>     | Pro <sup>19</sup>                                                                       | Pro <sup>30</sup>                                                                 |                    |
|                    | Tyr <sup>22</sup>                                                                       | Glu <sup>28</sup>                                                                 | Trp <sup>21</sup>                                                                       | Tyr <sup>26</sup> , Glu <sup>28</sup> , Pro <sup>92</sup>                         |                    |
|                    | Asn <sup>38</sup>                                                                       | Glu <sup>28</sup> , Gly <sup>29</sup> , Met <sup>32</sup>                         | Tyr <sup>22</sup>                                                                       | Glu <sup>28</sup>                                                                 |                    |
|                    | Ile <sup>39</sup>                                                                       | Met <sup>32</sup>                                                                 | Ser <sup>37</sup>                                                                       | Glu <sup>28</sup>                                                                 |                    |
|                    | Asn <sup>40</sup>                                                                       | Met <sup>32</sup>                                                                 | Asn <sup>38</sup>                                                                       | Glu <sup>28</sup> , Gly <sup>29</sup> , Met <sup>32</sup>                         |                    |
|                    | Lys <sup>41</sup>                                                                       | Met <sup>32</sup>                                                                 | Ile <sup>39</sup>                                                                       | Pro <sup>30</sup> , Met <sup>32</sup>                                             |                    |
|                    | Gln <sup>63</sup>                                                                       | Arg <sup>222</sup>                                                                | Asn <sup>40</sup>                                                                       | Pro <sup>30</sup> , Met <sup>32</sup>                                             |                    |
|                    | Arg <sup>73</sup>                                                                       | Arg <sup>91</sup> , Pro <sup>92</sup> , Asp <sup>113</sup>                        | Gln <sup>63</sup>                                                                       | Arg <sup>222</sup>                                                                |                    |
|                    | Asp <sup>74</sup>                                                                       | Asp <sup>113</sup> , Gly <sup>114</sup>                                           | Asp <sup>67</sup>                                                                       | Arg <sup>222</sup>                                                                |                    |
|                    | Ser <sup>77</sup>                                                                       | Asp <sup>113</sup> , Pro <sup>133</sup> , Tyr <sup>134</sup>                      | Arg <sup>73</sup>                                                                       | Pro <sup>92</sup> , Asp <sup>113</sup> , Tyr <sup>134</sup>                       |                    |
|                    | Asn <sup>78</sup>                                                                       | Asp <sup>113</sup> , Asn <sup>115</sup> , Pro <sup>133</sup>                      | Asp <sup>74</sup>                                                                       | Asp <sup>113</sup>                                                                |                    |
|                    | Tyr <sup>89</sup>                                                                       | Tyr <sup>134</sup>                                                                | Ser <sup>77</sup>                                                                       | Asp <sup>113</sup> , Pro <sup>133</sup>                                           |                    |
|                    | Pro <sup>90</sup>                                                                       | Tyr <sup>134</sup>                                                                | Asn <sup>78</sup>                                                                       | Asp <sup>113</sup> , Asn <sup>115</sup> , Pro <sup>133</sup>                      |                    |
|                    |                                                                                         |                                                                                   | Gly <sup>88</sup>                                                                       | Tyr <sup>134</sup>                                                                |                    |
|                    |                                                                                         |                                                                                   | Tyr <sup>89</sup>                                                                       | Tyr <sup>134</sup>                                                                |                    |
|                    | Binding site B                                                                          | Thr <sup>105</sup>                                                                | Gly <sup>191</sup>                                                                      | Met <sup>127</sup>                                                                | Arg <sup>238</sup> |
|                    |                                                                                         | Met <sup>127</sup>                                                                | Arg <sup>238</sup>                                                                      | Gln <sup>151</sup>                                                                | Tyr <sup>218</sup> |
| Gln <sup>151</sup> |                                                                                         | Tyr <sup>218</sup>                                                                | Arg <sup>152</sup>                                                                      | Tyr <sup>218</sup>                                                                |                    |
| Arg <sup>152</sup> |                                                                                         | Tyr <sup>218</sup>                                                                | Lys <sup>154</sup>                                                                      | Tyr <sup>194</sup> , Asp <sup>236</sup>                                           |                    |
| Lys <sup>154</sup> |                                                                                         | Tyr <sup>194</sup> , Asp <sup>236</sup>                                           | Tyr <sup>155</sup>                                                                      | Tyr <sup>218</sup> , Asp <sup>236</sup> , Trp <sup>234</sup>                      |                    |
| Tyr <sup>155</sup> |                                                                                         | Tyr <sup>194</sup> , Tyr <sup>218</sup> , Trp <sup>234</sup> , Asp <sup>236</sup> | Pro <sup>158</sup>                                                                      | Trp <sup>234</sup>                                                                |                    |
| Pro <sup>158</sup> |                                                                                         | Trp <sup>234</sup>                                                                | Glu <sup>159</sup>                                                                      | Tyr <sup>220</sup> , Arg <sup>222</sup> , Glu <sup>232</sup> , Trp <sup>234</sup> |                    |
| Glu <sup>159</sup> |                                                                                         | Tyr <sup>220</sup> , Arg <sup>222</sup> , Glu <sup>232</sup> , Trp <sup>234</sup> | Arg <sup>161</sup>                                                                      | Asn <sup>189</sup> , Asn <sup>192</sup>                                           |                    |
| Arg <sup>161</sup> |                                                                                         | Tyr <sup>187</sup> , Asn <sup>189</sup>                                           |                                                                                         |                                                                                   |                    |

**Table S4. Comparison of amino acid contacts at the m152/RAE1 $\gamma$  and mNKG2D/RAE1 $\beta$  interfaces**

|                | RAE1 $\gamma$ | m152                           | RAE1 $\beta$ | Murine NKG2D   |                        |
|----------------|---------------|--------------------------------|--------------|----------------|------------------------|
|                |               |                                |              | A chain        | B chain                |
| Binding site A | Pro14         | Ala89, Gly90                   | Pro14        | Ile200         |                        |
|                | Pro16         | Lys88                          | Pro16        | Lys202         |                        |
|                | Pro19         | Pro30                          |              |                |                        |
|                | Trp21         | Tyr26, Glu28, Glu90, Pro92     | Trp21        | Tyr168         |                        |
|                | Tyr22         | Glu28                          |              |                |                        |
|                | Asn38         | Glu28, Gly29, Met32            |              |                |                        |
|                | Ile39         | Met32                          |              |                |                        |
|                | Asn40         | Met32                          |              |                |                        |
|                | Lys41         | Met32                          |              |                |                        |
|                | Gln63         | Arg222                         |              |                |                        |
|                | Arg73         | Arg91, Pro92, Asp113           | Gln70        | Ser167, Tyr168 |                        |
|                | Asp74         | Asp113, Gly114                 | Arg73        | Tyr168, Tyr215 |                        |
|                | Ser77         | Asp113, Pro133, Tyr134         | Asn74        | Tyr215         |                        |
|                | Asn78         | Asp113, Asn115, Pro133         |              |                |                        |
|                | Tyr89         | Tyr134                         |              |                |                        |
|                | Pro90         | Tyr134                         |              |                |                        |
| Binding site B | Thr105        | Gly191                         |              |                |                        |
|                | Met127        | Arg238                         |              |                |                        |
|                | Gln151        | Tyr218                         | Glu148       |                | Lys166, Ser167         |
|                | Arg152        | Tyr218                         | Lys151       |                | Tyr168, Glu217, Asn223 |
|                | Lys154        | Tyr194, Asp236                 |              |                |                        |
|                | Tyr155        | Tyr194, Tyr218, Trp234, Asp236 | Phe155       |                | Tyr168, Tyr215         |
|                | Pro158        | Trp234                         | His158       |                | Ile200                 |
|                | Glu159        | Tyr220, Arg222, Glu232, Trp234 | Glu159       |                | Lys213, Tyr215         |
|                | Arg161        | Tyr187, Asn189                 |              |                |                        |
